# Supplementary material for: Obesity-promoting and anti-thermogenic effects of neutrophil gelatinase-associated lipocalin in mice
Source: PubMed Central journal article supplement (PMC5686189; doi:10.1038/s41598-017-15825-4), 2017-11-14
Supplement: 41598_2017_15825_MOESM1_ESM.pdf [file 41598_2017_15825_MOESM1_ESM.pdf]

## Supplementary Figures for Ishii et al.

### Obesity-promoting and anti-thermogenic effects of neutrophil gelatinase-associated lipocalin in mice

Akira Ishii<sup>1</sup>, Goro Katsuura<sup>2</sup>, Hirotaka Imamaki<sup>1,3</sup>, Hiroyuki Kimura<sup>4</sup>, Keita P. Mori<sup>1</sup>, Takashige Kuwabara<sup>5</sup>, Masato Kasahara<sup>6</sup>, Hideki Yokoi<sup>1</sup>, Kousaku Ohinata<sup>7</sup>, Tomoko Kawanishi<sup>8</sup>, Junichi Tsuchida<sup>9,10</sup>, Yuji Nakamoto<sup>11</sup>, Kazuwa Nakao<sup>12</sup>, Motoko Yanagita<sup>1,9</sup>, Masashi Mukoyama<sup>5</sup> & Kiyoshi Mori<sup>9,13,14</sup>

<sup>1</sup>Department of Nephrology, Graduate School of Medicine, Kyoto University, Kyoto, Japan.

<sup>2</sup>Department of Psychosomatic Internal Medicine, Kagoshima University Graduate School of Medical and Dental Sciences, Kagoshima, Japan.

<sup>3</sup>Department of Nephrology, Hirakata Kohsai Hospital, Hirakata, Japan.

<sup>4</sup>Department of Analytical and Bioinorganic Chemistry, Kyoto Pharmaceutical University, Kyoto, Japan.

<sup>5</sup>Department of Nephrology, Graduate School of Medical Sciences, Kumamoto University, Kumamoto, Japan.

<sup>6</sup>Institute for Clinical and Translational Science, Nara Medical University, Kashihara, Japan.

<sup>7</sup>Division of Food Science and Biotechnology, Graduate School of Agriculture, Kyoto University, Uji, Japan.

<sup>8</sup>Department of Nephrology, Ohkubo Hospital, Tokyo, Japan.

<sup>9</sup>TMK Project, Medical Innovation Center, Kyoto University Graduate School of Medicine, Kyoto, Japan.

<sup>10</sup>Research Unit/Nephrological & Endocrinological Science, Sohyaku, Innovative Research Division, Mitsubishi Tanabe Pharma Corporation, Toda, Japan.

<sup>11</sup>Department of Diagnostic Imaging and Nuclear Medicine, Kyoto University Graduate School of Medicine, Kyoto, Japan.

<sup>12</sup>TK Project, Medical Innovation Center, Kyoto University Graduate School of Medicine, Kyoto, Japan.

<sup>13</sup>Department of Molecular and Clinical Pharmacology, School of Pharmaceutical Sciences, University of Shizuoka, Shizuoka, Japan.

<sup>14</sup>Department of Nephrology and Kidney Research, Shizuoka General Hospital, Shizuoka, Japan.

Correspondence and requests for materials should be addressed to K.M. (kiyoshimori2001@gmail.com)

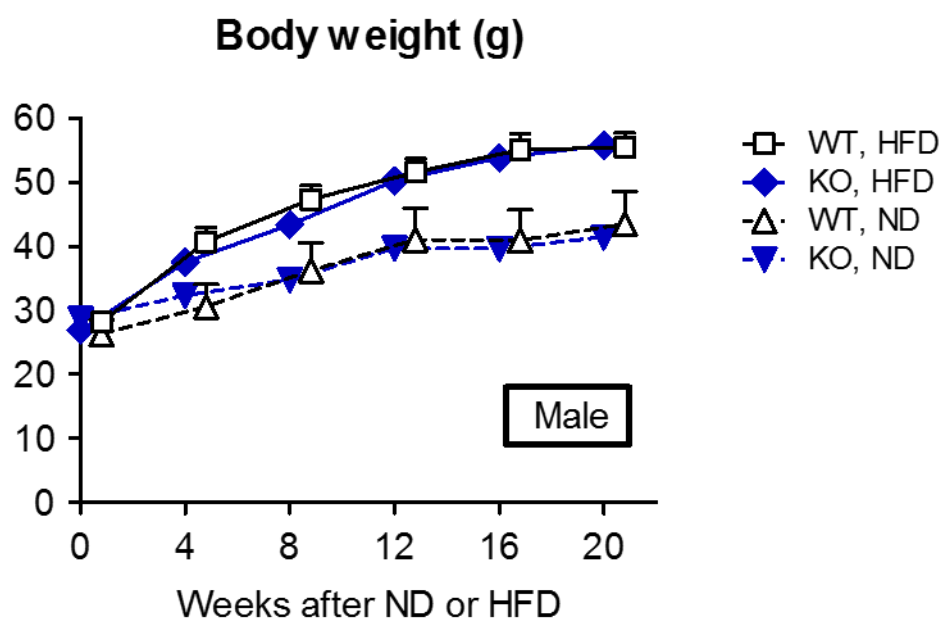

**Supplementary Figure S1. Body weights of *Lcn2* KO and WT male mice treated with ND or HFD since 8 weeks of age.**

Body weights were significantly elevated after 4 weeks of treatment in all 4 groups compared to 0 week, respectively ( $P < 0.05$ ,  $n = 4-8$ ).

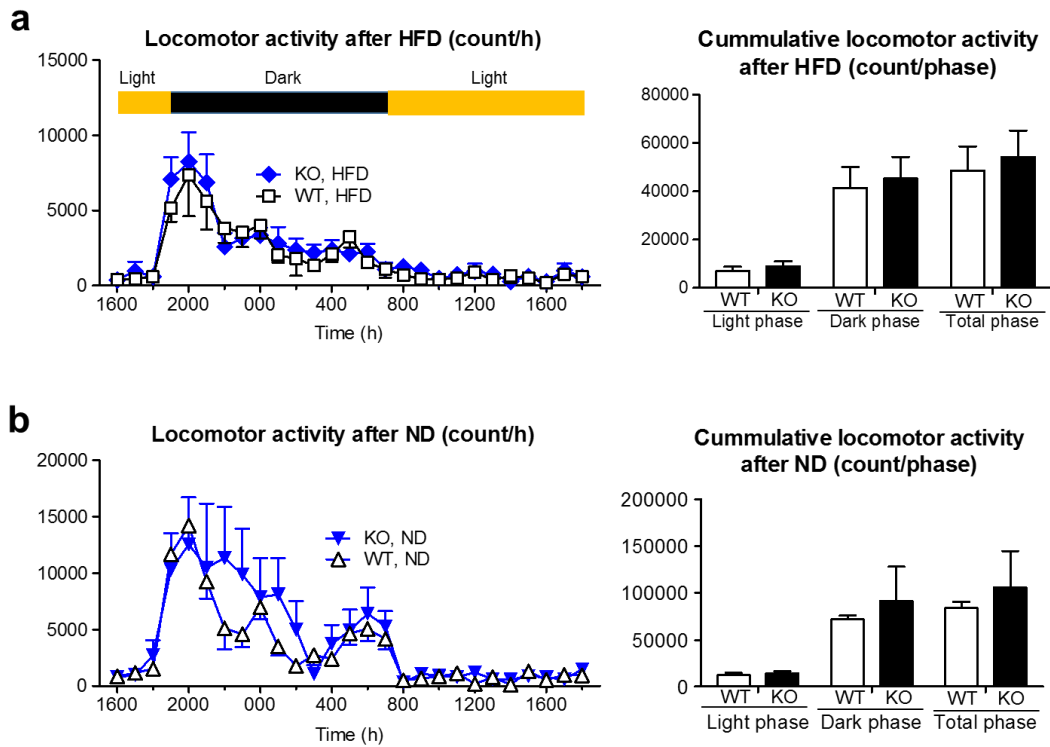

**Supplementary Figure S2. Locomotor activity of *Lcn2* KO and WT female mice.**

After 24 weeks of (a) HFD or (b) ND treatment, hourly (left) and cumulative (right) locomotor activities were examined (n = 4).

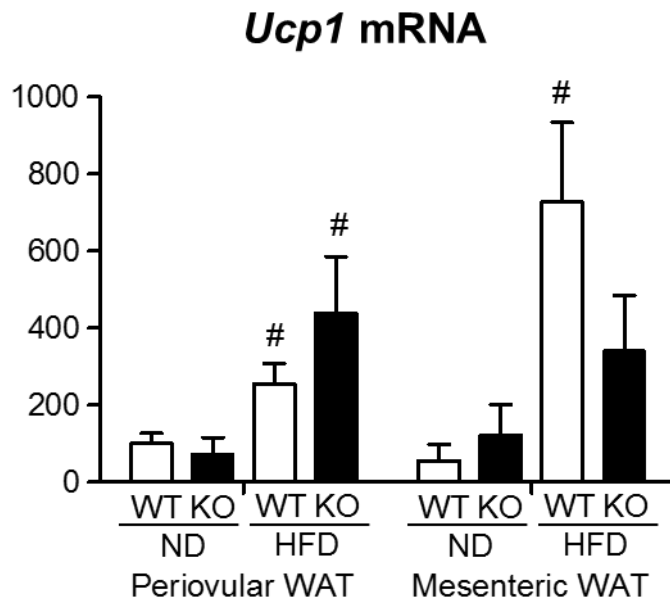

**Supplementary Figure S3. Gene expression of beige marker *Ucp1* in WAT of *Lcn2* KO and WT mice after ND or HFD feeding.**

After 24 weeks of HFD or ND treatment, *Ucp1* mRNA expression was examined in periovascular and mesenteric WAT (n = 4-5). Gene expression level was normalized for 18S ribosomal RNA expression. The level in periovascular WAT of WT mice given ND was defined as 100(%). #P < 0.05 vs ND.

### *Lcn2* mRNA

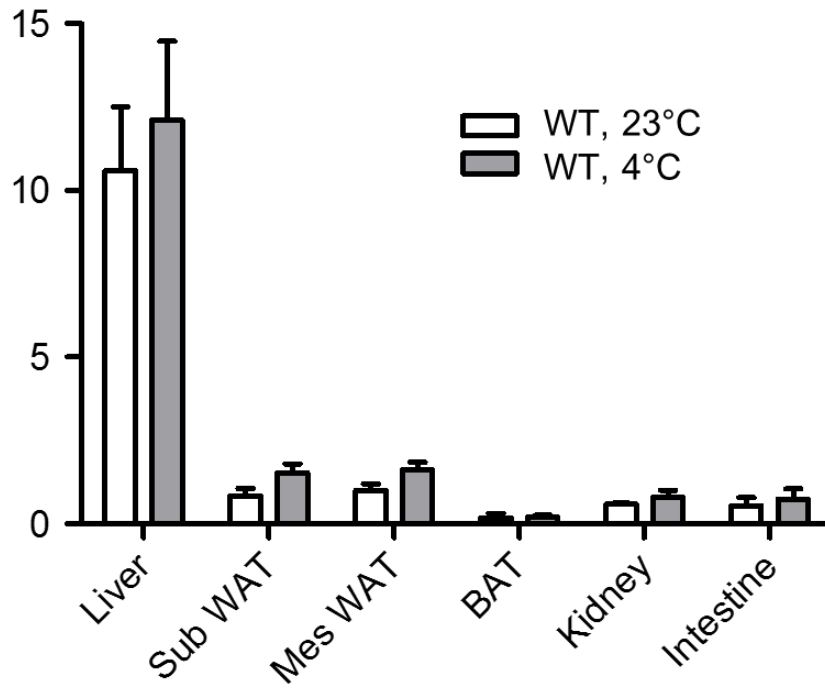

**Supplementary Figure S4. *Lcn2* mRNA expression in organs of WT mice after cold exposure.**

*Lcn2* mRNA expression levels at 4 hours after 4°C or 23°C treatment (n = 4). The level in Mes WAT at 23°C was defined as 1.0.

## BAT noradrenaline ( $\mu\text{g/g}$ tissue)

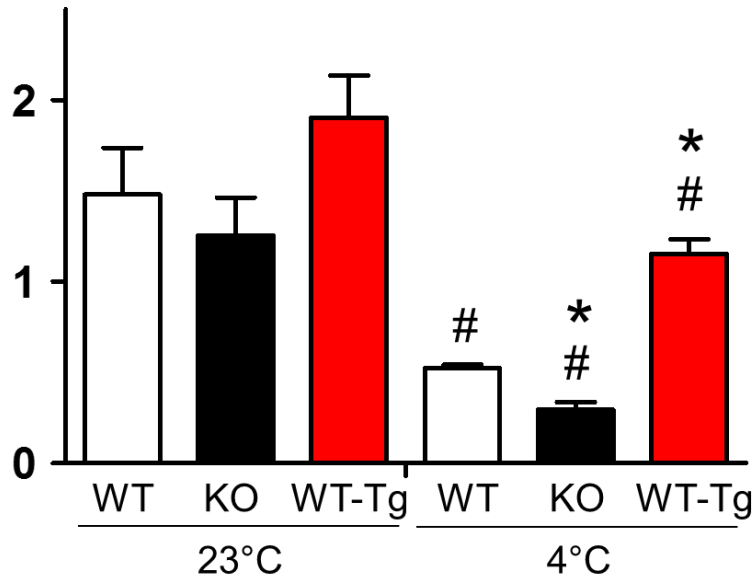

Supplementary Figure S5. Noradrenaline content in BAT after 4 h cold exposure in *Lcn2* KO, WT and WT-Tg mice (n = 5).

#P < 0.05 vs 23°C. \*P < 0.05 vs WT.

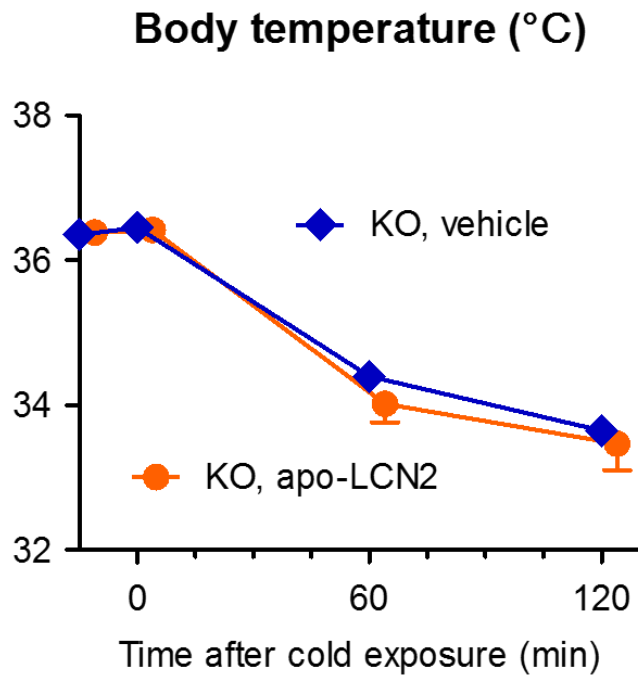

Supplementary Figure S6. Effects of apo-LCN2 (siderophore-free and iron-free LCN2) upon cold tolerance in *Lcn2* KO mice (n = 6).

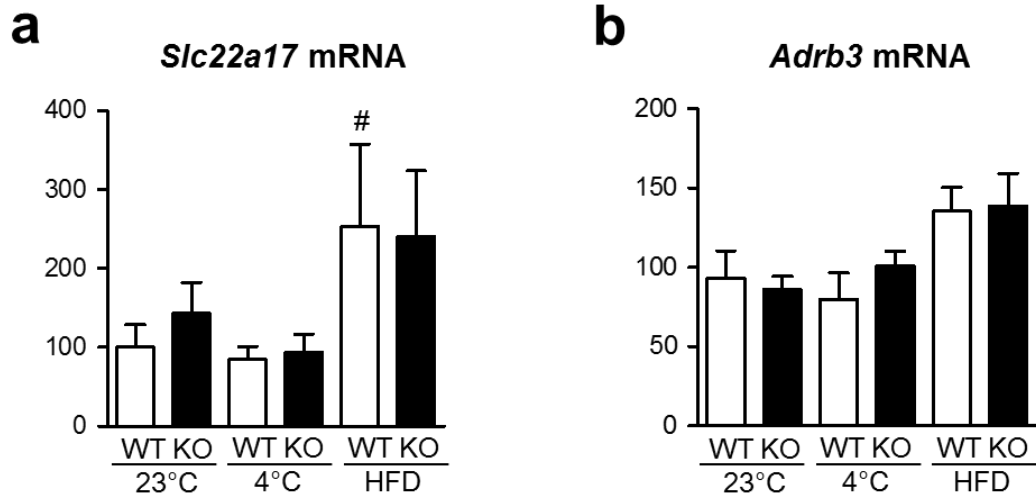

**Supplementary Figure S7. *Slc22a17* and *Adrb3* mRNA expression in BAT of *Lcn2* KO and WT mice after cold exposure or HFD treatment**

BAT was collected after 4 h of cold exposure or 24 weeks of HFD (n = 4-6). The level in WT BAT at 23°C given ND was defined as 100(%). #P < 0.05 vs 23°C.
